# Supplementary material for: Is Shape of a Fresh and Dried Leaf the Same?
Source: PubMed Central journal article supplement (PMC4821626; doi:10.1371/journal.pone.0153071), 2016-04-05
Supplement: pone.0153071.s002.pdf [file pone.0153071.s002.pdf]

**Table S1. Basic statistics on area of analysed leaves/leaflets** (SD = standard deviation; SW p – p-value in Shapiro-Wilk test, where <sup>N</sup> indicates normal distribution).

| Group                              | N   | Area (fresh) [cm <sup>2</sup> ] |      |      |      |                   | Area (dried) [cm <sup>2</sup> ] |      |      |      |                   | Area loss [cm <sup>2</sup> ] |     |     |     |                   | Area loss [%] |      |      |     |                   |
|------------------------------------|-----|---------------------------------|------|------|------|-------------------|---------------------------------|------|------|------|-------------------|------------------------------|-----|-----|-----|-------------------|---------------|------|------|-----|-------------------|
|                                    |     | Mean                            | Min  | Max  | SD   | SW p              | Mean                            | Min  | Max  | SD   | SW p              | Mean                         | Min | Max | SD  | SW p              | Mean          | Min  | Max  | SD  | SW p              |
| All samples                        | 794 | 17.9                            | 0.7  | 83.2 | 16.4 | 0.00              | 16.6                            | 0.6  | 81.7 | 15.4 | 0.00              | 1.3                          | 0.1 | 8.1 | 1.3 | 0.00              | 7.6           | 1.8  | 21.1 | 3.3 | 0.00              |
| <i>Betula pendula</i>              | 36  | 11.6                            | 6.8  | 18.2 | 3.2  | 0.19 <sup>N</sup> | 10.7                            | 6.2  | 16.7 | 2.9  | 0.23 <sup>N</sup> | 1.0                          | 0.4 | 1.7 | 0.3 | 0.85 <sup>N</sup> | 8.2           | 5.4  | 9.7  | 0.8 | 0.01              |
| <i>Fagus sylvatica</i>             | 34  | 51.3                            | 28.1 | 83.2 | 12.0 | 0.63 <sup>N</sup> | 49.5                            | 26.9 | 81.7 | 11.7 | 0.49 <sup>N</sup> | 1.8                          | 0.7 | 3.2 | 0.7 | 0.11 <sup>N</sup> | 3.5           | 1.8  | 5.4  | 1.1 | 0.10 <sup>N</sup> |
| <i>Ficus retusa</i>                | 36  | 19.2                            | 13.3 | 29.4 | 4.1  | 0.18 <sup>N</sup> | 16.3                            | 11.2 | 25.8 | 3.6  | 0.17 <sup>N</sup> | 2.9                          | 1.9 | 4.3 | 0.6 | 0.08 <sup>N</sup> | 15.2          | 11.7 | 17.8 | 1.5 | 0.26 <sup>N</sup> |
| <i>Fraxinus ornus</i>              | 29  | 16.2                            | 5.8  | 27.5 | 4.4  | 0.66 <sup>N</sup> | 15.5                            | 5.5  | 26.6 | 4.3  | 0.67 <sup>N</sup> | 0.8                          | 0.3 | 1.1 | 0.2 | 0.08 <sup>N</sup> | 4.9           | 3.2  | 6.9  | 0.9 | 0.47 <sup>N</sup> |
| <i>Lamium album</i>                | 35  | 9.7                             | 5.9  | 19.6 | 2.6  | 0.00              | 9.2                             | 5.2  | 18.5 | 2.5  | 0.00              | 0.5                          | 0.3 | 1.1 | 0.2 | 0.01              | 5.6           | 2.9  | 10.9 | 1.6 | 0.00              |
| <i>Lupinus polyphyllus</i>         | 37  | 13.0                            | 6.5  | 17.6 | 3.2  | 0.04              | 12.3                            | 6.0  | 16.8 | 3.2  | 0.03              | 0.7                          | 0.3 | 1.1 | 0.2 | 0.28 <sup>N</sup> | 5.6           | 2.3  | 10.6 | 1.7 | 0.19 <sup>N</sup> |
| <i>Oemleria cerasiformis</i>       | 32  | 27.7                            | 17.4 | 42.2 | 6.3  | 0.38 <sup>N</sup> | 26.4                            | 16.2 | 40.7 | 6.1  | 0.38 <sup>N</sup> | 1.3                          | 0.8 | 2.3 | 0.4 | 0.37 <sup>N</sup> | 4.9           | 3.2  | 7.5  | 1.1 | 0.27 <sup>N</sup> |
| <i>Plantago lanceolata</i>         | 29  | 26.0                            | 3.8  | 48.1 | 9.2  | 0.14 <sup>N</sup> | 23.7                            | 3.5  | 44.1 | 8.3  | 0.20 <sup>N</sup> | 2.3                          | 0.3 | 5.0 | 1.2 | 0.03              | 8.6           | 3.8  | 15.2 | 2.5 | 0.57 <sup>N</sup> |
| <i>Plantago major</i>              | 28  | 33.3                            | 16.1 | 55.6 | 10.4 | 0.34 <sup>N</sup> | 30.4                            | 14.3 | 50.2 | 9.6  | 0.35 <sup>N</sup> | 2.9                          | 1.7 | 5.4 | 0.9 | 0.07 <sup>N</sup> | 8.8           | 6.6  | 10.8 | 1.1 | 0.43 <sup>N</sup> |
| <i>Robinia pseudoacacia</i>        | 31  | 7.3                             | 3.7  | 11.3 | 2.2  | 0.39 <sup>N</sup> | 6.6                             | 3.4  | 10.5 | 2.0  | 0.35 <sup>N</sup> | 0.7                          | 0.3 | 1.1 | 0.2 | 0.40 <sup>N</sup> | 9.5           | 6.6  | 13.9 | 1.9 | 0.40 <sup>N</sup> |
| <i>Rosa arvensis</i> - shady       | 33  | 3.5                             | 2.3  | 6.2  | 0.9  | 0.03              | 3.3                             | 2.1  | 5.7  | 0.8  | 0.04              | 0.3                          | 0.1 | 0.5 | 0.1 | 0.18 <sup>N</sup> | 7.4           | 4.3  | 9.9  | 1.1 | 0.87 <sup>N</sup> |
| <i>Rosa arvensis</i> - sunny       | 29  | 4.2                             | 2.3  | 5.9  | 1.1  | 0.21 <sup>N</sup> | 3.8                             | 2.0  | 5.4  | 1.0  | 0.16 <sup>N</sup> | 0.4                          | 0.3 | 0.5 | 0.1 | 0.29 <sup>N</sup> | 8.9           | 6.8  | 12.9 | 1.6 | 0.01              |
| <i>Salix pentandra</i>             | 28  | 25.8                            | 10.0 | 46.0 | 10.5 | 0.31 <sup>N</sup> | 24.1                            | 9.1  | 42.4 | 9.8  | 0.32 <sup>N</sup> | 1.8                          | 0.8 | 3.6 | 0.8 | 0.06 <sup>N</sup> | 7.0           | 5.2  | 9.6  | 1.1 | 0.16 <sup>N</sup> |
| <i>Secale cereale</i>              | 30  | 6.3                             | 2.5  | 16.2 | 3.1  | 0.01              | 5.6                             | 2.0  | 14.4 | 2.8  | 0.01              | 0.7                          | 0.2 | 1.8 | 0.4 | 0.06 <sup>N</sup> | 12.1          | 5.8  | 21.1 | 3.5 | 0.07 <sup>N</sup> |
| <i>Sorbus aucuparia</i>            | 34  | 3.9                             | 2.4  | 7.1  | 1.1  | 0.01              | 3.5                             | 2.0  | 6.2  | 0.9  | 0.01              | 0.4                          | 0.2 | 0.9 | 0.1 | 0.01              | 11.4          | 7.2  | 16.1 | 2.0 | 0.46 <sup>N</sup> |
| <i>Syringa × chinensis</i>         | 38  | 10.4                            | 6.1  | 16.1 | 3.0  | 0.04              | 9.8                             | 5.7  | 15.0 | 2.8  | 0.03              | 0.6                          | 0.3 | 1.2 | 0.2 | 0.03              | 5.6           | 3.7  | 7.2  | 0.9 | 0.65 <sup>N</sup> |
| <i>Syringa × prestoniae</i>        | 37  | 46.9                            | 23.5 | 70.5 | 13.7 | 0.30 <sup>N</sup> | 42.3                            | 21.0 | 65.8 | 12.4 | 0.44 <sup>N</sup> | 4.6                          | 1.9 | 8.1 | 1.6 | 0.26 <sup>N</sup> | 9.7           | 6.2  | 13.6 | 1.7 | 0.84 <sup>N</sup> |
| <i>Syringa josikaea</i>            | 30  | 43.0                            | 19.8 | 80.2 | 17.5 | 0.04              | 40.4                            | 18.7 | 76.1 | 16.1 | 0.06 <sup>N</sup> | 2.5                          | 1.0 | 7.2 | 1.5 | 0.00              | 5.7           | 3.1  | 9.4  | 1.4 | 0.58 <sup>N</sup> |
| <i>Syringa meyeri</i>              | 35  | 8.2                             | 5.1  | 12.0 | 1.7  | 0.64 <sup>N</sup> | 7.3                             | 4.4  | 10.8 | 1.5  | 0.49 <sup>N</sup> | 0.9                          | 0.5 | 1.5 | 0.2 | 0.25 <sup>N</sup> | 11.3          | 8.3  | 15.8 | 1.7 | 0.08 <sup>N</sup> |
| <i>Syringa vulgaris</i>            | 32  | 40.4                            | 28.2 | 55.6 | 7.2  | 0.62 <sup>N</sup> | 38.0                            | 26.1 | 52.6 | 6.9  | 0.67 <sup>N</sup> | 2.4                          | 1.4 | 3.5 | 0.5 | 0.15 <sup>N</sup> | 6.0           | 4.3  | 8.3  | 1.0 | 0.75 <sup>N</sup> |
| <i>Trifolium repens</i>            | 36  | 1.4                             | 0.7  | 2.2  | 0.4  | 0.70 <sup>N</sup> | 1.3                             | 0.6  | 2.1  | 0.4  | 0.72 <sup>N</sup> | 0.1                          | 0.1 | 0.2 | 0.0 | 0.10 <sup>N</sup> | 7.5           | 4.0  | 14.1 | 2.2 | 0.24 <sup>N</sup> |
| <i>Vinca minor</i> - current year  | 39  | 4.0                             | 2.7  | 6.1  | 1.0  | 0.05              | 3.8                             | 2.5  | 5.9  | 0.9  | 0.06 <sup>N</sup> | 0.2                          | 0.1 | 0.3 | 0.1 | 0.00              | 4.0           | 2.3  | 5.8  | 0.9 | 0.29 <sup>N</sup> |
| <i>Vinca minor</i> - previous year | 31  | 4.3                             | 2.7  | 6.3  | 0.9  | 0.43 <sup>N</sup> | 4.2                             | 2.6  | 6.0  | 0.8  | 0.40 <sup>N</sup> | 0.2                          | 0.1 | 0.3 | 0.0 | 0.55 <sup>N</sup> | 3.9           | 2.6  | 5.7  | 0.8 | 0.50 <sup>N</sup> |
| <i>Wisteria floribunda</i>         | 35  | 18.3                            | 4.8  | 30.2 | 6.0  | 0.47 <sup>N</sup> | 16.8                            | 4.5  | 27.2 | 5.4  | 0.47 <sup>N</sup> | 1.5                          | 0.3 | 3.0 | 0.6 | 0.21 <sup>N</sup> | 8.1           | 4.6  | 11.2 | 1.5 | 0.68 <sup>N</sup> |
