# Supplementary material for: Is Shape of a Fresh and Dried Leaf the Same?
Source: PubMed Central journal article supplement (PMC4821626; doi:10.1371/journal.pone.0153071), 2016-04-05
Supplement: pone.0153071.s003.pdf [file pone.0153071.s003.pdf]

**Table S2. Basic statistics on mass of analysed leaves/leaflets** (SD = standard deviation; SW p = p-value in Shapiro-Wilk test, where <sup>N</sup> indicates normal distribution).

| Group                              | N   | Mass (fresh) [g] |       |       |       |                   | Mass (dried) [g] |       |       |       |                   | Mass loss [g] |       |       |       |                   | Mass loss [%] |      |      |     |                   |
|------------------------------------|-----|------------------|-------|-------|-------|-------------------|------------------|-------|-------|-------|-------------------|---------------|-------|-------|-------|-------------------|---------------|------|------|-----|-------------------|
|                                    |     | Mean             | Min   | Max   | SD    | SW p              | Mean             | Min   | Max   | SD    | SW p              | Mean          | Min   | Max   | SD    | SW p              | Mean          | Min  | Max  | SD  | SW p              |
| All samples                        | 794 | 0.315            | 0.006 | 1.924 | 0.319 | 0.00              | 0.085            | 0.002 | 0.412 | 0.079 | 0.00              | 0.230         | 0.004 | 1.670 | 0.249 | 0.00              | 69.4          | 44.4 | 92.6 | 9.1 | 0.00              |
| <i>Betula pendula</i>              | 36  | 0.167            | 0.088 | 0.277 | 0.050 | 0.38 <sup>N</sup> | 0.067            | 0.035 | 0.111 | 0.020 | 0.32 <sup>N</sup> | 0.101         | 0.052 | 0.166 | 0.030 | 0.38 <sup>N</sup> | 60.2          | 57.2 | 64.7 | 2.0 | 0.09 <sup>N</sup> |
| <i>Fagus sylvatica</i>             | 34  | 0.452            | 0.203 | 0.694 | 0.111 | 0.89 <sup>N</sup> | 0.119            | 0.054 | 0.186 | 0.031 | 0.78 <sup>N</sup> | 0.333         | 0.149 | 0.508 | 0.081 | 0.92 <sup>N</sup> | 73.8          | 72.2 | 75.8 | 0.9 | 0.50 <sup>N</sup> |
| <i>Ficus retusa</i>                | 36  | 0.528            | 0.341 | 0.784 | 0.117 | 0.33 <sup>N</sup> | 0.142            | 0.094 | 0.232 | 0.032 | 0.02              | 0.386         | 0.238 | 0.566 | 0.087 | 0.35 <sup>N</sup> | 73.1          | 69.6 | 77.8 | 1.9 | 0.54 <sup>N</sup> |
| <i>Fraxinus ornus</i>              | 29  | 0.262            | 0.111 | 0.411 | 0.072 | 0.78 <sup>N</sup> | 0.083            | 0.031 | 0.141 | 0.026 | 0.73 <sup>N</sup> | 0.179         | 0.073 | 0.271 | 0.049 | 0.52 <sup>N</sup> | 68.4          | 63.4 | 78.4 | 3.9 | 0.02              |
| <i>Lamium album</i>                | 35  | 0.139            | 0.089 | 0.343 | 0.047 | 0.00              | 0.036            | 0.023 | 0.081 | 0.010 | 0.00              | 0.103         | 0.061 | 0.262 | 0.038 | 0.00              | 73.5          | 60.4 | 79.7 | 3.9 | 0.01              |
| <i>Lupinus polyphyllus</i>         | 37  | 0.287            | 0.137 | 0.406 | 0.080 | 0.02              | 0.049            | 0.023 | 0.071 | 0.014 | 0.10 <sup>N</sup> | 0.238         | 0.114 | 0.335 | 0.067 | 0.02              | 82.8          | 80.5 | 84.8 | 1.1 | 0.32 <sup>N</sup> |
| <i>Oemleria cerasiformis</i>       | 32  | 0.345            | 0.226 | 0.474 | 0.066 | 0.62 <sup>N</sup> | 0.106            | 0.073 | 0.180 | 0.021 | 0.02              | 0.238         | 0.153 | 0.344 | 0.051 | 0.26 <sup>N</sup> | 68.9          | 61.9 | 75.5 | 3.5 | 0.56 <sup>N</sup> |
| <i>Plantago lanceolata</i>         | 29  | 0.692            | 0.070 | 1.484 | 0.297 | 0.05              | 0.086            | 0.013 | 0.130 | 0.026 | 0.46 <sup>N</sup> | 0.606         | 0.057 | 1.365 | 0.284 | 0.04              | 86.3          | 80.0 | 92.6 | 4.6 | 0.00              |
| <i>Plantago major</i>              | 28  | 0.771            | 0.376 | 1.386 | 0.267 | 0.23 <sup>N</sup> | 0.165            | 0.080 | 0.317 | 0.059 | 0.24 <sup>N</sup> | 0.606         | 0.296 | 1.069 | 0.210 | 0.22 <sup>N</sup> | 78.6          | 75.7 | 81.5 | 1.5 | 0.66 <sup>N</sup> |
| <i>Robinia pseudoacacia</i>        | 31  | 0.089            | 0.046 | 0.146 | 0.028 | 0.25 <sup>N</sup> | 0.031            | 0.012 | 0.053 | 0.012 | 0.05              | 0.058         | 0.033 | 0.093 | 0.017 | 0.31 <sup>N</sup> | 65.7          | 60.6 | 74.6 | 4.4 | 0.00              |
| <i>Rosa arvensis</i> - shady       | 33  | 0.035            | 0.022 | 0.077 | 0.011 | 0.00              | 0.017            | 0.010 | 0.040 | 0.006 | 0.00              | 0.018         | 0.011 | 0.037 | 0.006 | 0.00              | 51.9          | 45.2 | 60.0 | 4.2 | 0.32 <sup>N</sup> |
| <i>Rosa arvensis</i> - sunny       | 29  | 0.061            | 0.034 | 0.100 | 0.017 | 0.26 <sup>N</sup> | 0.030            | 0.017 | 0.051 | 0.009 | 0.09 <sup>N</sup> | 0.032         | 0.017 | 0.050 | 0.008 | 0.67 <sup>N</sup> | 52.0          | 44.4 | 57.8 | 3.1 | 0.81 <sup>N</sup> |
| <i>Salix pentandra</i>             | 28  | 0.450            | 0.146 | 0.915 | 0.212 | 0.12 <sup>N</sup> | 0.151            | 0.049 | 0.322 | 0.072 | 0.18 <sup>N</sup> | 0.299         | 0.097 | 0.593 | 0.145 | 0.06 <sup>N</sup> | 66.2          | 60.6 | 79.3 | 4.1 | 0.02              |
| <i>Secale cereale</i>              | 30  | 0.089            | 0.030 | 0.311 | 0.058 | 0.00              | 0.025            | 0.009 | 0.084 | 0.015 | 0.00              | 0.065         | 0.020 | 0.227 | 0.043 | 0.00              | 72.0          | 65.8 | 77.1 | 3.1 | 0.50 <sup>N</sup> |
| <i>Sorbus aucuparia</i>            | 34  | 0.057            | 0.031 | 0.117 | 0.017 | 0.00              | 0.023            | 0.012 | 0.046 | 0.007 | 0.02              | 0.034         | 0.019 | 0.071 | 0.010 | 0.00              | 59.4          | 56.8 | 62.1 | 1.5 | 0.36 <sup>N</sup> |
| <i>Syringa × chinensis</i>         | 38  | 0.184            | 0.098 | 0.308 | 0.062 | 0.04              | 0.067            | 0.032 | 0.117 | 0.024 | 0.06 <sup>N</sup> | 0.117         | 0.066 | 0.191 | 0.038 | 0.02              | 63.9          | 59.1 | 67.3 | 2.0 | 0.14 <sup>N</sup> |
| <i>Syringa × prestoniae</i>        | 37  | 1.030            | 0.445 | 1.924 | 0.354 | 0.31 <sup>N</sup> | 0.244            | 0.110 | 0.412 | 0.075 | 0.25 <sup>N</sup> | 0.787         | 0.334 | 1.670 | 0.293 | 0.14 <sup>N</sup> | 75.8          | 70.3 | 86.8 | 3.3 | 0.08 <sup>N</sup> |
| <i>Syringa josikaea</i>            | 30  | 0.683            | 0.184 | 1.498 | 0.382 | 0.02              | 0.184            | 0.080 | 0.359 | 0.074 | 0.04              | 0.500         | 0.098 | 1.167 | 0.316 | 0.02              | 69.6          | 51.9 | 81.5 | 9.3 | 0.00              |
| <i>Syringa meyeri</i>              | 35  | 0.155            | 0.095 | 0.241 | 0.036 | 0.29 <sup>N</sup> | 0.056            | 0.028 | 0.093 | 0.014 | 0.57 <sup>N</sup> | 0.100         | 0.060 | 0.149 | 0.025 | 0.22 <sup>N</sup> | 64.1          | 51.9 | 74.8 | 4.4 | 0.02              |
| <i>Syringa vulgaris</i>            | 32  | 0.793            | 0.522 | 1.071 | 0.150 | 0.35 <sup>N</sup> | 0.270            | 0.168 | 0.377 | 0.058 | 0.04              | 0.523         | 0.354 | 0.730 | 0.102 | 0.28 <sup>N</sup> | 66.0          | 53.1 | 69.9 | 3.5 | 0.00              |
| <i>Trifolium repens</i>            | 36  | 0.016            | 0.006 | 0.031 | 0.006 | 0.37 <sup>N</sup> | 0.004            | 0.002 | 0.007 | 0.001 | 0.04              | 0.012         | 0.004 | 0.024 | 0.005 | 0.43 <sup>N</sup> | 73.7          | 57.1 | 87.5 | 5.7 | 0.08 <sup>N</sup> |
| <i>Vinca minor</i> - current year  | 39  | 0.077            | 0.047 | 0.122 | 0.021 | 0.08 <sup>N</sup> | 0.017            | 0.009 | 0.029 | 0.005 | 0.29 <sup>N</sup> | 0.060         | 0.034 | 0.093 | 0.017 | 0.16 <sup>N</sup> | 77.4          | 70.8 | 90.5 | 3.9 | 0.02              |
| <i>Vinca minor</i> - previous year | 31  | 0.126            | 0.079 | 0.213 | 0.031 | 0.07 <sup>N</sup> | 0.045            | 0.026 | 0.073 | 0.014 | 0.03              | 0.081         | 0.048 | 0.146 | 0.020 | 0.04              | 64.2          | 49.6 | 75.7 | 5.0 | 0.20 <sup>N</sup> |
| <i>Wisteria floribunda</i>         | 35  | 0.197            | 0.046 | 0.337 | 0.068 | 0.76 <sup>N</sup> | 0.047            | 0.013 | 0.083 | 0.018 | 0.71 <sup>N</sup> | 0.150         | 0.033 | 0.259 | 0.051 | 0.62 <sup>N</sup> | 76.3          | 66.0 | 79.7 | 2.7 | 0.00              |
