# Supplementary material for: Is Shape of a Fresh and Dried Leaf the Same?
Source: PubMed Central journal article supplement (PMC4821626; doi:10.1371/journal.pone.0153071), 2016-04-05
Supplement: pone.0153071.s004.pdf [file pone.0153071.s004.pdf]

**Table S3. Basic statistics on principal component 1 (PC1) of analysed leaves/leaflets** (SD = standard deviation; SW p = p-value in Shapiro-Wilk test, where <sup>N</sup> indicates normal distribution).

| Group                              | N   | PC1 (fresh) |         |         |        |                   | PC1 (dried) |         |         |        |                   | ΔPC1    |         |        |        |                   |
|------------------------------------|-----|-------------|---------|---------|--------|-------------------|-------------|---------|---------|--------|-------------------|---------|---------|--------|--------|-------------------|
|                                    |     | Mean        | Min     | Max     | SD     | SW p              | Mean        | Min     | Max     | SD     | SW p              | Mean    | Min     | Max    | SD     | SW p              |
| All samples                        | 794 | 0.0036      | -0.4196 | 0.3965  | 0.1637 | 0.00              | -0.0036     | -0.4269 | 0.3769  | 0.1630 | 0.00              | 0.0072  | -0.0134 | 0.0376 | 0.0077 | 0.00              |
| <i>Betula pendula</i>              | 36  | 0.1324      | 0.0456  | 0.2191  | 0.0427 | 0.79 <sup>N</sup> | 0.1232      | 0.0334  | 0.2085  | 0.0421 | 0.84 <sup>N</sup> | 0.0093  | 0.0041  | 0.0141 | 0.0027 | 0.37 <sup>N</sup> |
| <i>Fagus sylvatica</i>             | 34  | 0.1805      | 0.1312  | 0.2221  | 0.0284 | 0.07 <sup>N</sup> | 0.1777      | 0.1230  | 0.2222  | 0.0293 | 0.14 <sup>N</sup> | 0.0028  | -0.0047 | 0.0114 | 0.0044 | 0.21 <sup>N</sup> |
| <i>Ficus retusa</i>                | 36  | -0.0343     | -0.1158 | 0.0597  | 0.0429 | 0.38 <sup>N</sup> | -0.0542     | -0.1414 | 0.0426  | 0.0433 | 0.51 <sup>N</sup> | 0.0199  | 0.0070  | 0.0344 | 0.0068 | 0.80 <sup>N</sup> |
| <i>Fraxinus ornus</i>              | 29  | 0.0452      | -0.1092 | 0.1790  | 0.0748 | 0.05              | 0.0415      | -0.1168 | 0.1702  | 0.0759 | 0.03              | 0.0037  | -0.0069 | 0.0127 | 0.0045 | 0.95 <sup>N</sup> |
| <i>Lamium album</i>                | 35  | -0.0458     | -0.0996 | 0.0634  | 0.0395 | 0.02              | -0.0544     | -0.1070 | 0.0529  | 0.0389 | 0.02              | 0.0087  | 0.0009  | 0.0162 | 0.0036 | 0.77 <sup>N</sup> |
| <i>Lupinus polyphyllus</i>         | 37  | -0.1954     | -0.2450 | -0.1547 | 0.0261 | 0.06 <sup>N</sup> | -0.2004     | -0.2525 | -0.1580 | 0.0267 | 0.11 <sup>N</sup> | 0.0050  | 0.0004  | 0.0102 | 0.0026 | 0.45 <sup>N</sup> |
| <i>Oemleria cerasiformis</i>       | 32  | -0.0934     | -0.1873 | 0.0046  | 0.0496 | 0.60 <sup>N</sup> | -0.0959     | -0.1896 | -0.0046 | 0.0491 | 0.54 <sup>N</sup> | 0.0025  | -0.0012 | 0.0113 | 0.0027 | 0.00              |
| <i>Plantago lanceolata</i>         | 29  | -0.3189     | -0.3814 | -0.2407 | 0.0270 | 0.10 <sup>N</sup> | -0.3238     | -0.3878 | -0.2461 | 0.0267 | 0.14 <sup>N</sup> | 0.0049  | -0.0007 | 0.0085 | 0.0022 | 0.58 <sup>N</sup> |
| <i>Plantago major</i>              | 28  | 0.1838      | 0.1243  | 0.2877  | 0.0398 | 0.16 <sup>N</sup> | 0.1794      | 0.1171  | 0.2798  | 0.0401 | 0.13 <sup>N</sup> | 0.0044  | -0.0041 | 0.0117 | 0.0041 | 0.52 <sup>N</sup> |
| <i>Robinia pseudoacacia</i>        | 31  | 0.2611      | 0.1047  | 0.3965  | 0.0588 | 0.70 <sup>N</sup> | 0.2428      | 0.0783  | 0.3769  | 0.0599 | 0.54 <sup>N</sup> | 0.0182  | 0.0016  | 0.0376 | 0.0095 | 0.49 <sup>N</sup> |
| <i>Rosa arvensis</i> - shady       | 33  | 0.1262      | 0.0217  | 0.2401  | 0.0573 | 0.63 <sup>N</sup> | 0.1225      | 0.0122  | 0.2320  | 0.0605 | 0.50 <sup>N</sup> | 0.0037  | -0.0117 | 0.0210 | 0.0082 | 0.76 <sup>N</sup> |
| <i>Rosa arvensis</i> - sunny       | 29  | 0.1343      | 0.0335  | 0.2180  | 0.0478 | 0.70 <sup>N</sup> | 0.1292      | 0.0242  | 0.2149  | 0.0497 | 0.73 <sup>N</sup> | 0.0051  | -0.0100 | 0.0145 | 0.0067 | 0.09 <sup>N</sup> |
| <i>Salix pentandra</i>             | 28  | -0.0688     | -0.2222 | 0.0903  | 0.0688 | 0.98 <sup>N</sup> | -0.0731     | -0.2304 | 0.0799  | 0.0694 | 0.99 <sup>N</sup> | 0.0043  | -0.0013 | 0.0112 | 0.0032 | 0.64 <sup>N</sup> |
| <i>Secale cereale</i>              | 30  | -0.3979     | -0.4196 | -0.3628 | 0.0145 | 0.01              | -0.4062     | -0.4269 | -0.3735 | 0.0133 | 0.01              | 0.0082  | 0.0044  | 0.0171 | 0.0032 | 0.01              |
| <i>Sorbus aucuparia</i>            | 34  | 0.0344      | -0.0469 | 0.2384  | 0.0525 | 0.00              | 0.0157      | -0.0523 | 0.2165  | 0.0510 | 0.00              | 0.0186  | 0.0054  | 0.0305 | 0.0063 | 0.84 <sup>N</sup> |
| <i>Syringa</i> × <i>chinensis</i>  | 38  | -0.0372     | -0.0761 | 0.0119  | 0.0210 | 0.39 <sup>N</sup> | -0.0417     | -0.0810 | 0.0070  | 0.0217 | 0.42 <sup>N</sup> | 0.0046  | -0.0012 | 0.0088 | 0.0028 | 0.10 <sup>N</sup> |
| <i>Syringa</i> × <i>prestoniae</i> | 37  | 0.0269      | -0.0629 | 0.1108  | 0.0354 | 0.57 <sup>N</sup> | 0.0196      | -0.0757 | 0.1055  | 0.0365 | 0.81 <sup>N</sup> | 0.0074  | -0.0033 | 0.0181 | 0.0045 | 0.98 <sup>N</sup> |
| <i>Syringa josikaea</i>            | 30  | -0.0709     | -0.1978 | 0.0301  | 0.0635 | 0.11 <sup>N</sup> | -0.0763     | -0.2082 | 0.0204  | 0.0646 | 0.17 <sup>N</sup> | 0.0054  | -0.0045 | 0.0156 | 0.0044 | 0.24 <sup>N</sup> |
| <i>Syringa meyeri</i>              | 35  | 0.1445      | -0.0221 | 0.3145  | 0.0949 | 0.15 <sup>N</sup> | 0.1336      | -0.0298 | 0.2940  | 0.0952 | 0.11 <sup>N</sup> | 0.0110  | -0.0119 | 0.0301 | 0.0086 | 0.84 <sup>N</sup> |
| <i>Syringa vulgaris</i>            | 32  | 0.1248      | 0.0513  | 0.1567  | 0.0268 | 0.01              | 0.1250      | 0.0541  | 0.1587  | 0.0270 | 0.01              | -0.0002 | -0.0065 | 0.0067 | 0.0029 | 0.99 <sup>N</sup> |
| <i>Trifolium repens</i>            | 36  | 0.2002      | 0.0952  | 0.3190  | 0.0492 | 0.40 <sup>N</sup> | 0.1903      | 0.0665  | 0.3214  | 0.0524 | 0.29 <sup>N</sup> | 0.0099  | -0.0134 | 0.0344 | 0.0120 | 0.65 <sup>N</sup> |
| <i>Vinca minor</i> - current year  | 39  | -0.0894     | -0.1593 | 0.0278  | 0.0356 | 0.04              | -0.0910     | -0.1611 | 0.0240  | 0.0359 | 0.04              | 0.0016  | -0.0043 | 0.0065 | 0.0027 | 0.55 <sup>N</sup> |
| <i>Vinca minor</i> - previous year | 31  | -0.0881     | -0.1573 | 0.1884  | 0.0868 | 0.00              | -0.0893     | -0.1604 | 0.1906  | 0.0877 | 0.00              | 0.0012  | -0.0047 | 0.0068 | 0.0026 | 0.39 <sup>N</sup> |
| <i>Wisteria floribunda</i>         | 35  | -0.0899     | -0.1694 | -0.0398 | 0.0327 | 0.19 <sup>N</sup> | -0.1002     | -0.1717 | -0.0472 | 0.0304 | 0.46 <sup>N</sup> | 0.0102  | -0.0042 | 0.0203 | 0.0059 | 0.41 <sup>N</sup> |
