# Supplementary material for: Is Shape of a Fresh and Dried Leaf the Same?
Source: PubMed Central journal article supplement (PMC4821626; doi:10.1371/journal.pone.0153071), 2016-04-05
Supplement: pone.0153071.s005.pdf [file pone.0153071.s005.pdf]

**Table S4. Basic statistics on principal component 2 (PC2) of analysed leaves/leaflets** (SD = standard deviation; SW p = p-value in Shapiro-Wilk test, where <sup>N</sup> indicates normal distribution).

| Group                              | N   | PC2 (fresh) |         |         |        |                   | PC2 (dried) |         |         |        |                   | ΔPC2    |         |         |        |                   |
|------------------------------------|-----|-------------|---------|---------|--------|-------------------|-------------|---------|---------|--------|-------------------|---------|---------|---------|--------|-------------------|
|                                    |     | Mean        | Min     | Max     | SD     | SW p              | Mean        | Min     | Max     | SD     | SW p              | Mean    | Min     | Max     | SD     | SW p              |
| All samples                        | 794 | 0.0001      | -0.1719 | 0.1200  | 0.0607 | 0.00              | -0.0001     | -0.1821 | 0.1255  | 0.0625 | 0.00              | 0.0002  | -0.0171 | 0.0208  | 0.0057 | 0.00              |
| <i>Betula pendula</i>              | 36  | -0.1512     | -0.1719 | -0.1261 | 0.0107 | 0.52 <sup>N</sup> | -0.1525     | -0.1728 | -0.1225 | 0.0116 | 0.48 <sup>N</sup> | 0.0013  | -0.0044 | 0.0084  | 0.0030 | 0.79 <sup>N</sup> |
| <i>Fagus sylvatica</i>             | 34  | 0.0367      | 0.0135  | 0.0600  | 0.0121 | 0.55 <sup>N</sup> | 0.0364      | 0.0113  | 0.0615  | 0.0127 | 0.51 <sup>N</sup> | 0.0003  | -0.0039 | 0.0043  | 0.0019 | 0.97 <sup>N</sup> |
| <i>Ficus retusa</i>                | 36  | 0.0439      | 0.0144  | 0.0814  | 0.0153 | 0.63 <sup>N</sup> | 0.0521      | 0.0206  | 0.0934  | 0.0155 | 0.28 <sup>N</sup> | -0.0082 | -0.0150 | -0.0020 | 0.0035 | 0.47 <sup>N</sup> |
| <i>Fraxinus ornus</i>              | 29  | 0.0207      | -0.0154 | 0.0773  | 0.0261 | 0.05              | 0.0237      | -0.0126 | 0.0815  | 0.0272 | 0.01              | -0.0030 | -0.0089 | 0.0032  | 0.0027 | 0.89 <sup>N</sup> |
| <i>Lamium album</i>                | 35  | -0.1432     | -0.1683 | -0.1211 | 0.0114 | 0.19 <sup>N</sup> | -0.1543     | -0.1821 | -0.1296 | 0.0125 | 0.20 <sup>N</sup> | 0.0111  | 0.0031  | 0.0208  | 0.0043 | 0.73 <sup>N</sup> |
| <i>Lupinus polyphyllus</i>         | 37  | -0.0056     | -0.0168 | 0.0040  | 0.0055 | 0.63 <sup>N</sup> | -0.0067     | -0.0173 | 0.0046  | 0.0054 | 0.77 <sup>N</sup> | 0.0011  | -0.0030 | 0.0071  | 0.0022 | 0.48 <sup>N</sup> |
| <i>Oemleria cerasiformis</i>       | 32  | 0.0429      | 0.0141  | 0.0811  | 0.0156 | 0.42 <sup>N</sup> | 0.0425      | 0.0139  | 0.0781  | 0.0152 | 0.27 <sup>N</sup> | 0.0004  | -0.0018 | 0.0066  | 0.0018 | 0.00              |
| <i>Plantago lanceolata</i>         | 29  | 0.0273      | 0.0075  | 0.0475  | 0.0115 | 0.17 <sup>N</sup> | 0.0285      | 0.0082  | 0.0493  | 0.0116 | 0.34 <sup>N</sup> | -0.0012 | -0.0051 | 0.0036  | 0.0019 | 0.52 <sup>N</sup> |
| <i>Plantago major</i>              | 28  | 0.0117      | -0.0153 | 0.0382  | 0.0141 | 0.71 <sup>N</sup> | 0.0120      | -0.0195 | 0.0374  | 0.0148 | 0.44 <sup>N</sup> | -0.0003 | -0.0041 | 0.0042  | 0.0022 | 0.65 <sup>N</sup> |
| <i>Robinia pseudoacacia</i>        | 31  | 0.0074      | -0.0436 | 0.0450  | 0.0207 | 0.11 <sup>N</sup> | -0.0038     | -0.0577 | 0.0426  | 0.0214 | 0.23 <sup>N</sup> | 0.0112  | 0.0025  | 0.0196  | 0.0048 | 0.22 <sup>N</sup> |
| <i>Rosa arvensis</i> - shady       | 33  | 0.0707      | 0.0487  | 0.0955  | 0.0122 | 0.78 <sup>N</sup> | 0.0684      | 0.0475  | 0.0957  | 0.0126 | 0.49 <sup>N</sup> | 0.0023  | -0.0103 | 0.0124  | 0.0051 | 0.95 <sup>N</sup> |
| <i>Rosa arvensis</i> - sunny       | 29  | 0.0644      | 0.0283  | 0.0985  | 0.0219 | 0.06 <sup>N</sup> | 0.0619      | 0.0224  | 0.0933  | 0.0230 | 0.04              | 0.0026  | -0.0098 | 0.0180  | 0.0066 | 0.63 <sup>N</sup> |
| <i>Salix pentandra</i>             | 28  | -0.0259     | -0.0513 | 0.0134  | 0.0147 | 0.00              | -0.0264     | -0.0467 | 0.0142  | 0.0147 | 0.00              | 0.0005  | -0.0046 | 0.0038  | 0.0021 | 0.17 <sup>N</sup> |
| <i>Secale cereale</i>              | 30  | 0.0072      | -0.0004 | 0.0138  | 0.0041 | 0.13 <sup>N</sup> | 0.0093      | 0.0009  | 0.0158  | 0.0042 | 0.13 <sup>N</sup> | -0.0021 | -0.0063 | 0.0024  | 0.0018 | 0.99 <sup>N</sup> |
| <i>Sorbus aucuparia</i>            | 34  | 0.0279      | -0.0116 | 0.0647  | 0.0171 | 0.69 <sup>N</sup> | 0.0205      | -0.0227 | 0.0648  | 0.0178 | 0.87 <sup>N</sup> | 0.0074  | -0.0001 | 0.0148  | 0.0035 | 0.78 <sup>N</sup> |
| <i>Syringa × chinensis</i>         | 38  | -0.0549     | -0.0755 | -0.0233 | 0.0112 | 0.27 <sup>N</sup> | -0.0536     | -0.0732 | -0.0233 | 0.0108 | 0.47 <sup>N</sup> | -0.0013 | -0.0042 | 0.0021  | 0.0014 | 0.90 <sup>N</sup> |
| <i>Syringa × prestoniae</i>        | 37  | -0.0187     | -0.0423 | 0.0153  | 0.0130 | 0.56 <sup>N</sup> | -0.0168     | -0.0404 | 0.0242  | 0.0147 | 0.11 <sup>N</sup> | -0.0019 | -0.0090 | 0.0028  | 0.0030 | 0.30 <sup>N</sup> |
| <i>Syringa josikaea</i>            | 30  | 0.0344      | -0.0767 | 0.1200  | 0.0457 | 0.11 <sup>N</sup> | 0.0368      | -0.0766 | 0.1255  | 0.0470 | 0.10 <sup>N</sup> | -0.0024 | -0.0132 | 0.0048  | 0.0043 | 0.01              |
| <i>Syringa meyeri</i>              | 35  | 0.0251      | -0.0266 | 0.0862  | 0.0300 | 0.26 <sup>N</sup> | 0.0303      | -0.0217 | 0.0926  | 0.0308 | 0.17 <sup>N</sup> | -0.0052 | -0.0171 | 0.0019  | 0.0045 | 0.28 <sup>N</sup> |
| <i>Syringa vulgaris</i>            | 32  | -0.0930     | -0.1063 | -0.0697 | 0.0102 | 0.03              | -0.0948     | -0.1080 | -0.0699 | 0.0109 | 0.01              | 0.0018  | -0.0034 | 0.0056  | 0.0024 | 0.39 <sup>N</sup> |
| <i>Trifolium repens</i>            | 36  | 0.0541      | 0.0287  | 0.0734  | 0.0086 | 0.20 <sup>N</sup> | 0.0560      | 0.0274  | 0.0751  | 0.0100 | 0.16 <sup>N</sup> | -0.0019 | -0.0146 | 0.0160  | 0.0076 | 0.57 <sup>N</sup> |
| <i>Vinca minor</i> - current year  | 39  | 0.0145      | -0.0126 | 0.0300  | 0.0092 | 0.09 <sup>N</sup> | 0.0148      | -0.0134 | 0.0309  | 0.0095 | 0.06 <sup>N</sup> | -0.0002 | -0.0033 | 0.0039  | 0.0016 | 0.81 <sup>N</sup> |
| <i>Vinca minor</i> - previous year | 31  | 0.0143      | -0.0083 | 0.0379  | 0.0112 | 0.97 <sup>N</sup> | 0.0153      | -0.0073 | 0.0333  | 0.0104 | 0.72 <sup>N</sup> | -0.0009 | -0.0058 | 0.0153  | 0.0035 | 0.00              |
| <i>Wisteria floribunda</i>         | 35  | 0.0240      | -0.0132 | 0.0604  | 0.0150 | 0.84 <sup>N</sup> | 0.0293      | -0.0078 | 0.0631  | 0.0143 | 0.84 <sup>N</sup> | -0.0054 | -0.0123 | 0.0024  | 0.0031 | 0.97 <sup>N</sup> |
