# Supplementary material for: Is Shape of a Fresh and Dried Leaf the Same?
Source: PubMed Central journal article supplement (PMC4821626; doi:10.1371/journal.pone.0153071), 2016-04-05
Supplement: pone.0153071.s006.pdf [file pone.0153071.s006.pdf]

**Table S5. Basic statistics on  $\sin \alpha$  and  $\cos \alpha$**  (SD = standard deviation; SW p = p-value in Shapiro-Wilk test, where <sup>N</sup> indicates normal distribution).

| Group                              | N   | $\sin \alpha$ |        |       |       |                   | $\cos \alpha$ |        |        |       |                   |
|------------------------------------|-----|---------------|--------|-------|-------|-------------------|---------------|--------|--------|-------|-------------------|
|                                    |     | Mean          | Min    | Max   | SD    | SW p              | Mean          | Min    | Max    | SD    | SW p              |
| All samples                        | 794 | 0.644         | -1.000 | 1.000 | 0.538 | 0.00              | -0.024        | -1.000 | 1.000  | 0.544 | 0.00              |
| <i>Betula pendula</i>              | 36  | 0.932         | 0.544  | 1.000 | 0.093 | 0.00              | 0.151         | -0.600 | 0.839  | 0.321 | 1.00 <sup>N</sup> |
| <i>Fagus sylvatica</i>             | 34  | 0.406         | -0.994 | 1.000 | 0.737 | 0.00              | 0.083         | -0.996 | 0.995  | 0.557 | 0.46 <sup>N</sup> |
| <i>Ficus retusa</i>                | 36  | 0.883         | 0.502  | 0.998 | 0.123 | 0.00              | -0.401        | -0.865 | -0.067 | 0.213 | 0.13 <sup>N</sup> |
| <i>Fraxinus ornus</i>              | 29  | 0.526         | -0.928 | 1.000 | 0.567 | 0.00              | -0.513        | -1.000 | 0.676  | 0.394 | 0.03              |
| <i>Lamium album</i>                | 35  | 0.588         | 0.189  | 0.970 | 0.188 | 0.36 <sup>N</sup> | 0.765         | 0.243  | 0.982  | 0.190 | 0.00              |
| <i>Lupinus polyphyllus</i>         | 37  | 0.895         | 0.341  | 1.000 | 0.134 | 0.00              | 0.164         | -0.738 | 0.940  | 0.398 | 0.72 <sup>N</sup> |
| <i>Oemleria cerasiformis</i>       | 32  | 0.717         | -0.743 | 1.000 | 0.426 | 0.00              | 0.084         | -0.970 | 0.999  | 0.559 | 0.24 <sup>N</sup> |
| <i>Plantago lanceolata</i>         | 29  | 0.874         | -0.415 | 0.998 | 0.267 | 0.00              | -0.231        | -0.910 | 0.647  | 0.343 | 0.94 <sup>N</sup> |
| <i>Plantago major</i>              | 28  | 0.608         | -0.970 | 1.000 | 0.650 | 0.00              | -0.007        | -0.806 | 0.995  | 0.481 | 0.43 <sup>N</sup> |
| <i>Robinia pseudoacacia</i>        | 31  | 0.783         | 0.115  | 0.988 | 0.208 | 0.00              | 0.544         | 0.154  | 0.993  | 0.226 | 0.67 <sup>N</sup> |
| <i>Rosa arvensis</i> - shady       | 33  | 0.229         | -0.991 | 1.000 | 0.798 | 0.00              | 0.209         | -0.997 | 0.956  | 0.543 | 0.03              |
| <i>Rosa arvensis</i> - sunny       | 29  | 0.482         | -1.000 | 1.000 | 0.626 | 0.00              | 0.172         | -0.993 | 0.991  | 0.611 | 0.08 <sup>N</sup> |
| <i>Salix pentandra</i>             | 28  | 0.739         | -0.829 | 0.993 | 0.434 | 0.00              | 0.034         | -0.997 | 0.959  | 0.530 | 0.27 <sup>N</sup> |
| <i>Secale cereale</i>              | 30  | 0.942         | 0.643  | 1.000 | 0.070 | 0.00              | -0.240        | -0.765 | 0.464  | 0.227 | 0.13 <sup>N</sup> |
| <i>Sorbus aucuparia</i>            | 34  | 0.903         | 0.463  | 1.000 | 0.099 | 0.00              | 0.381         | -0.006 | 0.886  | 0.175 | 0.36 <sup>N</sup> |
| <i>Syringa × chinensis</i>         | 38  | 0.745         | -0.974 | 1.000 | 0.488 | 0.00              | -0.259        | -0.972 | 0.683  | 0.387 | 0.09 <sup>N</sup> |
| <i>Syringa × prestoniae</i>        | 37  | 0.835         | -0.565 | 1.000 | 0.306 | 0.00              | -0.221        | -0.999 | 0.520  | 0.409 | 0.60 <sup>N</sup> |
| <i>Syringa josikaea</i>            | 30  | 0.775         | -0.382 | 1.000 | 0.400 | 0.00              | -0.248        | -0.982 | 0.664  | 0.436 | 0.70 <sup>N</sup> |
| <i>Syringa meyeri</i>              | 35  | 0.750         | -0.679 | 1.000 | 0.393 | 0.00              | -0.400        | -0.999 | 0.248  | 0.363 | 0.16 <sup>N</sup> |
| <i>Syringa vulgaris</i>            | 32  | -0.001        | -0.994 | 0.998 | 0.710 | 0.00              | 0.442         | -0.970 | 0.999  | 0.571 | 0.00              |
| <i>Trifolium repens</i>            | 36  | 0.476         | -0.999 | 1.000 | 0.718 | 0.00              | -0.121        | -0.995 | 0.880  | 0.515 | 0.30 <sup>N</sup> |
| <i>Vinca minor</i> - current year  | 39  | 0.317         | -0.999 | 1.000 | 0.727 | 0.00              | -0.078        | -0.999 | 1.000  | 0.623 | 0.06 <sup>N</sup> |
| <i>Vinca minor</i> - previous year | 31  | 0.259         | -0.992 | 1.000 | 0.657 | 0.00              | -0.408        | -0.999 | 1.000  | 0.600 | 0.00              |
| <i>Wisteria floribunda</i>         | 35  | 0.759         | -0.394 | 1.000 | 0.342 | 0.00              | -0.469        | -0.992 | 0.116  | 0.305 | 0.04              |
