# Supplementary material for: Is Shape of a Fresh and Dried Leaf the Same?
Source: PubMed Central journal article supplement (PMC4821626; doi:10.1371/journal.pone.0153071), 2016-04-05
Supplement: pone.0153071.s007.pdf [file pone.0153071.s007.pdf]

**Table S6. Basic statistics on shape change and specific leaf area (SLA) of analysed leaves/leaflets** (SD = standard deviation; SW p = p-value in Shapiro-Wilk test, where <sup>N</sup> indicates normal distribution).

| Group                              | N   | Shape change (vector length) |        |        |        |                   | SLA [cm <sup>2</sup> /g] |     |     |     |                   |
|------------------------------------|-----|------------------------------|--------|--------|--------|-------------------|--------------------------|-----|-----|-----|-------------------|
|                                    |     | Mean                         | Min    | Max    | SD     | SW p              | Mean                     | Min | Max | SD  | SW p              |
| All samples                        | 794 | 0.0095                       | 0.0003 | 0.0403 | 0.0073 | 0.00              | 228                      | 65  | 570 | 90  | 0.00              |
| <i>Betula pendula</i>              | 36  | 0.0099                       | 0.0047 | 0.0148 | 0.0025 | 0.44 <sup>N</sup> | 177                      | 151 | 221 | 18  | 0.06 <sup>N</sup> |
| <i>Fagus sylvatica</i>             | 34  | 0.0046                       | 0.0005 | 0.0117 | 0.0031 | 0.02              | 435                      | 381 | 519 | 32  | 0.47 <sup>N</sup> |
| <i>Ficus retusa</i>                | 36  | 0.0221                       | 0.0109 | 0.0346 | 0.0057 | 0.73 <sup>N</sup> | 136                      | 94  | 165 | 12  | 0.17 <sup>N</sup> |
| <i>Fraxinus ornus</i>              | 29  | 0.0064                       | 0.0006 | 0.0127 | 0.0030 | 0.44 <sup>N</sup> | 199                      | 166 | 297 | 28  | 0.00              |
| <i>Lamium album</i>                | 35  | 0.0145                       | 0.0048 | 0.0244 | 0.0042 | 0.99 <sup>N</sup> | 269                      | 223 | 325 | 22  | 0.99 <sup>N</sup> |
| <i>Lupinus polyphyllus</i>         | 37  | 0.0055                       | 0.0005 | 0.0123 | 0.0027 | 0.76 <sup>N</sup> | 269                      | 197 | 350 | 34  | 0.58 <sup>N</sup> |
| <i>Oemleria cerasiformis</i>       | 32  | 0.0032                       | 0.0004 | 0.0131 | 0.0027 | 0.00              | 263                      | 167 | 384 | 53  | 0.56 <sup>N</sup> |
| <i>Plantago lanceolata</i>         | 29  | 0.0054                       | 0.0016 | 0.0098 | 0.0021 | 0.80 <sup>N</sup> | 314                      | 192 | 508 | 102 | 0.01              |
| <i>Plantago major</i>              | 28  | 0.0058                       | 0.0022 | 0.0119 | 0.0026 | 0.16 <sup>N</sup> | 205                      | 170 | 257 | 23  | 0.09 <sup>N</sup> |
| <i>Robinia pseudoacacia</i>        | 31  | 0.0222                       | 0.0067 | 0.0403 | 0.0088 | 0.64 <sup>N</sup> | 245                      | 187 | 350 | 44  | 0.01              |
| <i>Rosa arvensis</i> - shady       | 33  | 0.0089                       | 0.0006 | 0.0231 | 0.0054 | 0.39 <sup>N</sup> | 212                      | 154 | 289 | 30  | 0.60 <sup>N</sup> |
| <i>Rosa arvensis</i> - sunny       | 29  | 0.0102                       | 0.0043 | 0.0189 | 0.0039 | 0.15 <sup>N</sup> | 143                      | 112 | 186 | 21  | 0.09 <sup>N</sup> |
| <i>Salix pentandra</i>             | 28  | 0.0050                       | 0.0004 | 0.0115 | 0.0028 | 0.12 <sup>N</sup> | 177                      | 142 | 279 | 28  | 0.00              |
| <i>Secale cereale</i>              | 30  | 0.0087                       | 0.0044 | 0.0171 | 0.0031 | 0.01              | 270                      | 192 | 337 | 34  | 0.77 <sup>N</sup> |
| <i>Sorbus aucuparia</i>            | 34  | 0.0204                       | 0.0072 | 0.0322 | 0.0061 | 0.93 <sup>N</sup> | 172                      | 151 | 210 | 11  | 0.14 <sup>N</sup> |
| <i>Syringa</i> × <i>chinensis</i>  | 38  | 0.0051                       | 0.0004 | 0.0093 | 0.0025 | 0.24 <sup>N</sup> | 161                      | 124 | 198 | 21  | 0.10 <sup>N</sup> |
| <i>Syringa</i> × <i>prestoniae</i> | 37  | 0.0084                       | 0.0017 | 0.0183 | 0.0042 | 0.53 <sup>N</sup> | 195                      | 139 | 267 | 33  | 0.11 <sup>N</sup> |
| <i>Syringa josikaea</i>            | 30  | 0.0077                       | 0.0008 | 0.0162 | 0.0036 | 0.44 <sup>N</sup> | 236                      | 176 | 330 | 41  | 0.16 <sup>N</sup> |
| <i>Syringa meyeri</i>              | 35  | 0.0141                       | 0.0028 | 0.0317 | 0.0066 | 0.53 <sup>N</sup> | 151                      | 121 | 243 | 24  | 0.00              |
| <i>Syringa vulgaris</i>            | 32  | 0.0037                       | 0.0006 | 0.0085 | 0.0019 | 0.43 <sup>N</sup> | 152                      | 106 | 183 | 22  | 0.03              |
| <i>Trifolium repens</i>            | 36  | 0.0153                       | 0.0017 | 0.0380 | 0.0082 | 0.55 <sup>N</sup> | 333                      | 212 | 570 | 65  | 0.00              |
| <i>Vinca minor</i> - current year  | 39  | 0.0030                       | 0.0003 | 0.0069 | 0.0019 | 0.11 <sup>N</sup> | 237                      | 178 | 321 | 33  | 0.79 <sup>N</sup> |
| <i>Vinca minor</i> - previous year | 31  | 0.0035                       | 0.0003 | 0.0153 | 0.0029 | 0.00              | 102                      | 65  | 204 | 32  | 0.00              |
| <i>Wisteria floribunda</i>         | 35  | 0.0128                       | 0.0065 | 0.0204 | 0.0036 | 0.26 <sup>N</sup> | 402                      | 253 | 526 | 53  | 0.73 <sup>N</sup> |
