# Supplementary material for: Is Shape of a Fresh and Dried Leaf the Same?
Source: PubMed Central journal article supplement (PMC4821626; doi:10.1371/journal.pone.0153071), 2016-04-05
Supplement: pone.0153071.s008.pdf [file pone.0153071.s008.pdf]

**Table S7. Results (p-values) of paired Student's t-test or Wilcoxon signed-rank test for repeated measurements of principal component 1 (PC1), PC2, area and mass of analysed fresh and dried leaves/leaflets. Bolded values ( $p > 0.05$ ) indicate that the compared populations do not differ significantly.**

| Group                              | N   | PC1            |               | PC2            |               | Area           |               | Mass           |               |
|------------------------------------|-----|----------------|---------------|----------------|---------------|----------------|---------------|----------------|---------------|
|                                    |     | Student's test | Wilcoxon test | Student's test | Wilcoxon test | Student's test | Wilcoxon test | Student's test | Wilcoxon test |
| All samples                        | 794 |                | 0.00          |                | <b>0.30</b>   |                | 0.00          |                | 0.00          |
| <i>Betula pendula</i>              | 36  | 0.00           |               | 0.02           |               | 0.00           |               | 0.00           |               |
| <i>Fagus sylvatica</i>             | 34  | 0.00           |               | <b>0.39</b>    |               | 0.00           |               | 0.00           |               |
| <i>Ficus retusa</i>                | 36  | 0.00           |               | 0.00           |               | 0.00           |               |                | 0.00          |
| <i>Fraxinus ornus</i>              | 29  |                | 0.00          |                | 0.00          | 0.00           |               | 0.00           |               |
| <i>Lamium album</i>                | 35  |                | 0.00          | 0.00           |               |                | 0.00          |                | 0.00          |
| <i>Lupinus polyphyllus</i>         | 37  | 0.00           |               | 0.00           |               |                | 0.00          |                | 0.00          |
| <i>Oemleria cerasiformis</i>       | 32  | 0.00           |               | <b>0.18</b>    |               | 0.00           |               |                | 0.00          |
| <i>Plantago lanceolata</i>         | 29  | 0.00           |               | 0.00           |               | 0.00           |               |                | 0.00          |
| <i>Plantago major</i>              | 28  | 0.00           |               | <b>0.44</b>    |               | 0.00           |               | 0.00           |               |
| <i>Robinia pseudoacacia</i>        | 31  | 0.00           |               | 0.00           |               | 0.00           |               |                | 0.00          |
| <i>Rosa arvensis</i> - shady       | 33  | 0.01           |               | 0.01           |               |                | 0.00          |                | 0.00          |
| <i>Rosa arvensis</i> - sunny       | 29  | 0.00           |               |                | <b>0.06</b>   | 0.00           |               | 0.00           |               |
| <i>Salix pentandra</i>             | 28  | 0.00           |               |                | <b>0.12</b>   | 0.00           |               | 0.00           |               |
| <i>Secale cereale</i>              | 30  |                | 0.00          | 0.00           |               |                | 0.00          |                | 0.00          |
| <i>Sorbus aucuparia</i>            | 34  |                | 0.00          | 0.00           |               |                | 0.00          |                | 0.00          |
| <i>Syringa</i> × <i>chinensis</i>  | 38  | 0.00           |               | 0.00           |               |                | 0.00          |                | 0.00          |
| <i>Syringa</i> × <i>prestoniae</i> | 37  | 0.00           |               | 0.00           |               | 0.00           |               | 0.00           |               |
| <i>Syringa josikaea</i>            | 30  | 0.00           |               | 0.00           |               |                | 0.00          |                | 0.00          |
| <i>Syringa meyeri</i>              | 35  | 0.00           |               | 0.00           |               | 0.00           |               | 0.00           |               |
| <i>Syringa vulgaris</i>            | 32  |                | <b>0.68</b>   |                | 0.00          | 0.00           |               |                | 0.00          |
| <i>Trifolium repens</i>            | 36  | 0.00           |               | <b>0.15</b>    |               | 0.00           |               |                | 0.00          |
| <i>Vinca minor</i> - current year  | 39  |                | 0.00          | <b>0.37</b>    |               |                | 0.00          | 0.00           |               |
| <i>Vinca minor</i> - previous year | 31  |                | 0.01          | <b>0.14</b>    |               | 0.00           |               |                | 0.00          |
| <i>Wisteria floribunda</i>         | 35  | 0.00           |               | 0.00           |               | 0.00           |               |                | 0.00          |
