# Supplementary material for: Is Shape of a Fresh and Dried Leaf the Same?
Source: PubMed Central journal article supplement (PMC4821626; doi:10.1371/journal.pone.0153071), 2016-04-05
Supplement: pone.0153071.s009.pdf [file pone.0153071.s009.pdf]

**Table S8. Correlations between shape change (vector length) and selected variables expressed as coefficient r values. Bolded r values are significant with  $p < 0.05$ .**

| Variable                          | Group                              | Mass (fresh) | Mass (dried) | Area (fresh) | Area (dried) | SLA          | Mass loss    | Area loss   | Area loss [relative] | Mass loss [relative] |
|-----------------------------------|------------------------------------|--------------|--------------|--------------|--------------|--------------|--------------|-------------|----------------------|----------------------|
| Shape change (vector length)      | All samples                        | <b>-0.22</b> | <b>-0.22</b> | <b>-0.28</b> | <b>-0.30</b> | -0.04        | <b>-0.21</b> | -0.02       | <b>0.64</b>          | <b>-0.12</b>         |
|                                   | <i>Betula pendula</i>              | -0.05        | -0.06        | -0.05        | -0.05        | 0.12         | -0.05        | -0.02       | 0.13                 | 0.04                 |
|                                   | <i>Fagus sylvatica</i>             | -0.21        | -0.21        | -0.22        | -0.24        | 0.05         | -0.21        | 0.34        | <b>0.61</b>          | -0.01                |
|                                   | <i>Ficus retusa</i>                | -0.19        | -0.11        | -0.28        | -0.29        | <b>-0.37</b> | -0.21        | -0.17       | 0.19                 | -0.22                |
|                                   | <i>Fraxinus ornus</i>              | <b>-0.65</b> | <b>-0.67</b> | <b>-0.63</b> | <b>-0.64</b> | 0.25         | <b>-0.60</b> | -0.21       | <b>0.56</b>          | 0.27                 |
|                                   | <i>Lamium album</i>                | -0.02        | -0.11        | -0.07        | -0.09        | 0.19         | 0.01         | <b>0.35</b> | <b>0.48</b>          | 0.19                 |
|                                   | <i>Lupinus polyphyllus</i>         | <b>-0.58</b> | <b>-0.50</b> | <b>-0.57</b> | <b>-0.61</b> | 0.10         | <b>-0.59</b> | <b>0.35</b> | <b>0.82</b>          | -0.21                |
|                                   | <i>Oemleria cerasiformis</i>       | -0.24        | -0.25        | -0.21        | -0.22        | -0.04        | -0.22        | 0.01        | 0.21                 | -0.01                |
|                                   | <i>Plantago lanceolata</i>         | 0.19         | 0.02         | 0.15         | 0.09         | 0.09         | 0.19         | <b>0.57</b> | <b>0.80</b>          | 0.08                 |
|                                   | <i>Plantago major</i>              | -0.32        | -0.31        | <b>-0.37</b> | <b>-0.39</b> | -0.02        | -0.32        | -0.20       | <b>0.46</b>          | 0.01                 |
|                                   | <i>Robinia pseudoacacia</i>        | 0.05         | 0.10         | -0.03        | -0.07        | -0.23        | 0.02         | <b>0.41</b> | <b>0.68</b>          | -0.15                |
|                                   | <i>Rosa arvensis</i> - shady       | -0.23        | -0.32        | -0.17        | -0.18        | 0.34         | -0.11        | -0.06       | 0.23                 | <b>0.43</b>          |
|                                   | <i>Rosa arvensis</i> - sunny       | 0.14         | 0.10         | 0.14         | 0.13         | 0.09         | 0.17         | 0.30        | 0.10                 | 0.14                 |
|                                   | <i>Salix pentandra</i>             | -0.15        | -0.23        | -0.19        | -0.21        | 0.34         | -0.11        | 0.04        | <b>0.71</b>          | 0.27                 |
|                                   | <i>Secale cereale</i>              | -0.34        | -0.35        | -0.35        | <b>-0.39</b> | 0.23         | -0.33        | -0.00       | <b>0.86</b>          | -0.09                |
|                                   | <i>Sorbus aucuparia</i>            | 0.15         | 0.12         | 0.07         | 0.02         | -0.18        | 0.16         | <b>0.40</b> | <b>0.59</b>          | 0.18                 |
|                                   | <i>Syringa</i> × <i>chinensis</i>  | <b>-0.33</b> | -0.29        | <b>-0.40</b> | <b>-0.42</b> | -0.01        | <b>-0.36</b> | -0.02       | <b>0.63</b>          | -0.06                |
|                                   | <i>Syringa</i> × <i>prestoniae</i> | -0.18        | -0.32        | -0.23        | -0.28        | 0.11         | -0.14        | 0.18        | <b>0.67</b>          | 0.15                 |
|                                   | <i>Syringa josikaea</i>            | -0.04        | -0.03        | -0.10        | -0.12        | -0.16        | -0.04        | 0.07        | 0.32                 | -0.01                |
|                                   | <i>Syringa meyeri</i>              | -0.29        | -0.33        | -0.24        | -0.28        | 0.33         | -0.25        | 0.17        | <b>0.53</b>          | 0.16                 |
|                                   | <i>Syringa vulgaris</i>            | 0.21         | 0.17         | 0.20         | 0.19         | -0.02        | 0.20         | <b>0.41</b> | 0.26                 | -0.02                |
|                                   | <i>Trifolium repens</i>            | <b>-0.44</b> | <b>-0.42</b> | <b>-0.47</b> | <b>-0.49</b> | 0.05         | <b>-0.42</b> | -0.01       | <b>0.45</b>          | -0.16                |
| <i>Vinca minor</i> - current year | 0.26                               | 0.02         | 0.16         | 0.13         | 0.21         | 0.32         | <b>0.46</b>  | <b>0.50</b> | <b>0.37</b>          |                      |
| <i>Vinca minor</i> - previous     | -0.04                              | -0.11        | 0.08         | 0.07         | 0.18         | 0.02         | 0.32         | <b>0.41</b> | 0.20                 |                      |
| <i>Wisteria floribunda</i>        | <b>0.51</b>                        | <b>0.54</b>  | <b>0.49</b>  | <b>0.46</b>  | <b>-0.38</b> | <b>0.49</b>  | <b>0.65</b>  | <b>0.67</b> | -0.22                |                      |
